# Supplementary material for: Heterotheca inuloides (Mexican arnica) metabolites protect Caenorhabditis elegans from oxidative damage and inhibit nitric oxide production
Source: Royal Society of Chemistry journal article supplement (doi:10.1039/c5ra21646j), 2016-01-01

**Supplementary Figure 1.** UV-Vis absorption spectra of compound **1** in 10 mM buffer phosphate solution at pH 7.5. Solid line represents compound alone (25  $\mu\text{M}$ ), while the dashed line represents the compound (25  $\mu\text{M}$ ) plus  $\text{Cu}^{2+}$  ions (50  $\mu\text{M}$ ).

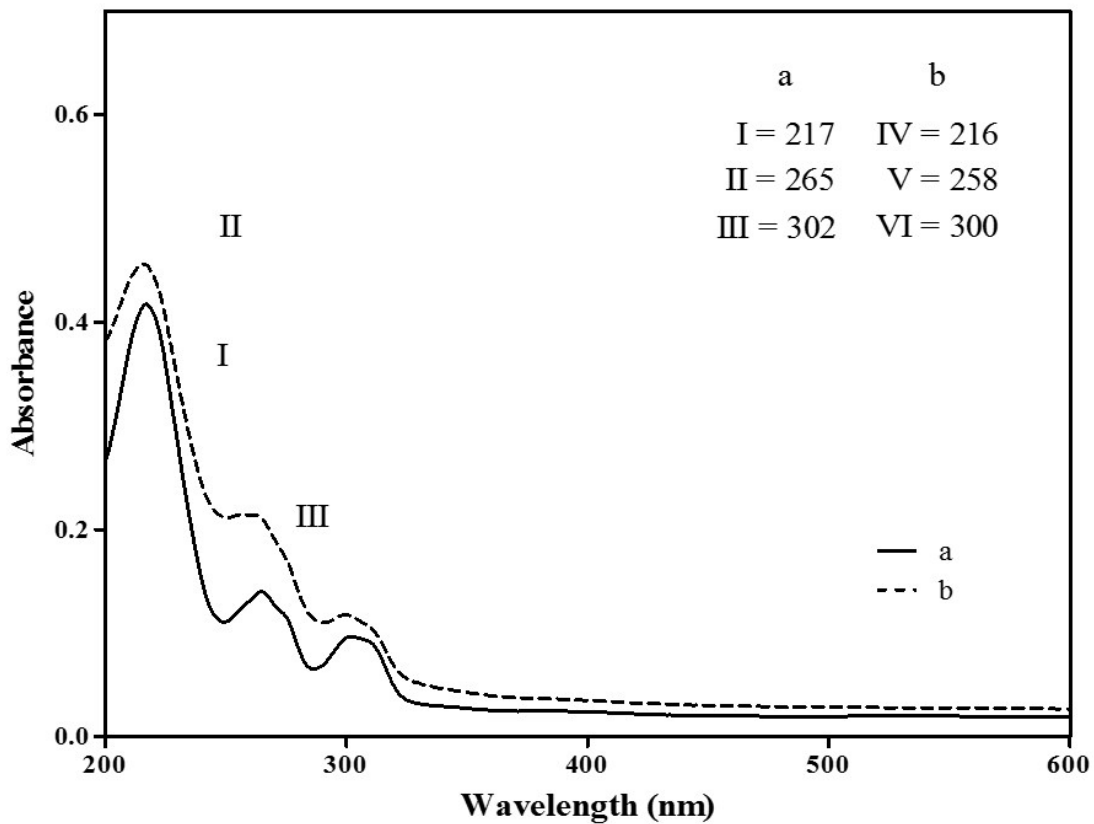

**Supplementary Figure 2.** UV-Vis absorption spectra of compound **3** in 10 mM buffer phosphate solution at pH 7.5. Solid line represents compound alone (25  $\mu\text{M}$ ), while the dashed line represents the compound (25  $\mu\text{M}$ ) plus  $\text{Cu}^{2+}$  ions (50 $\mu\text{M}$ ).

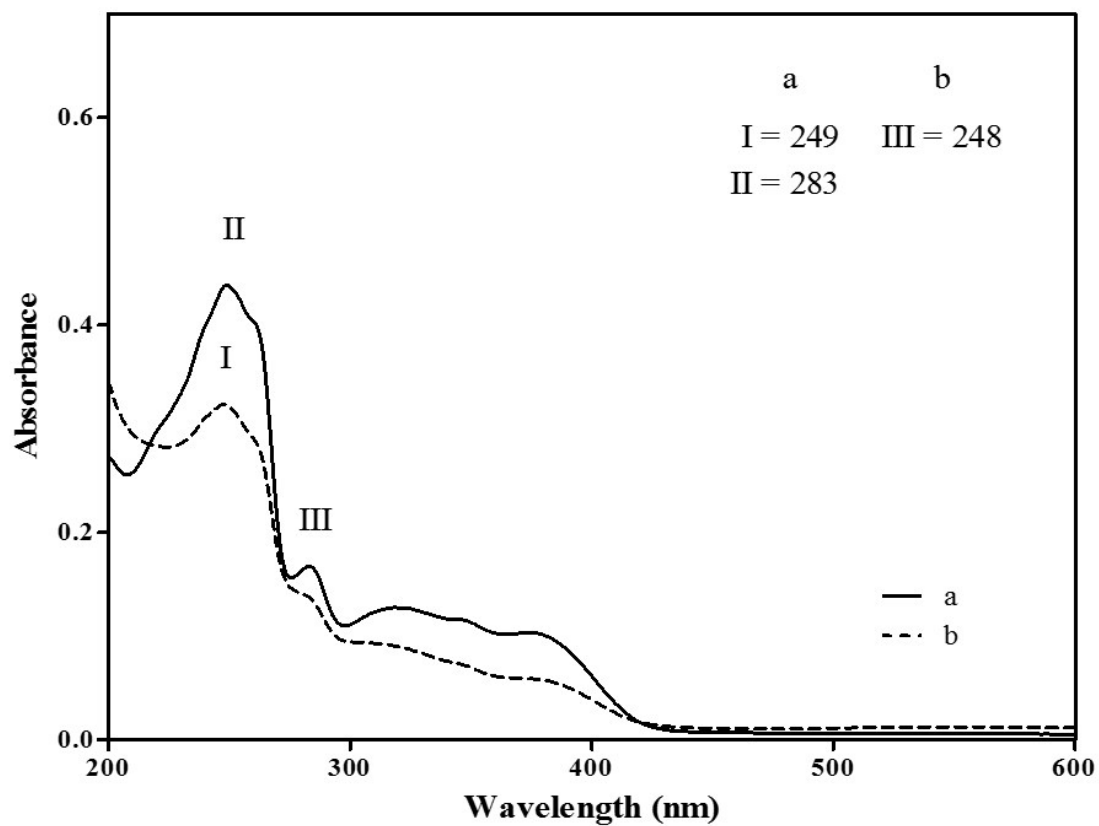

Supplement: c5ra21646j1.pdf [file c5ra21646j1.pdf]
